# Supplementary material
Source: PubMed Central journal article supplement (PMC11302550)

Supplementary Figure 1

a)

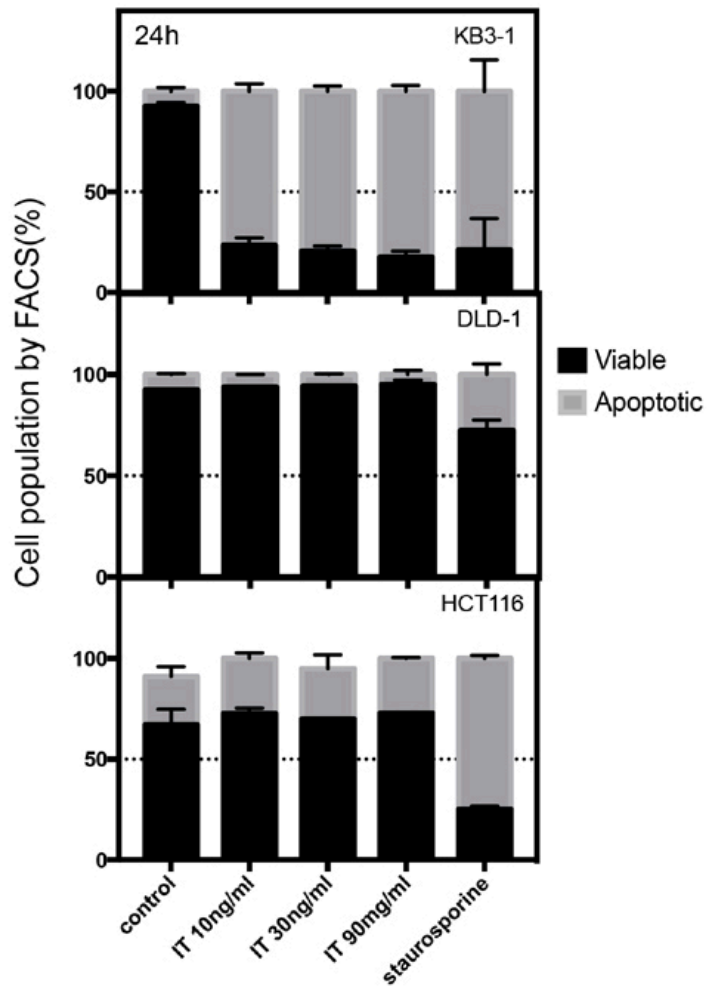

b)

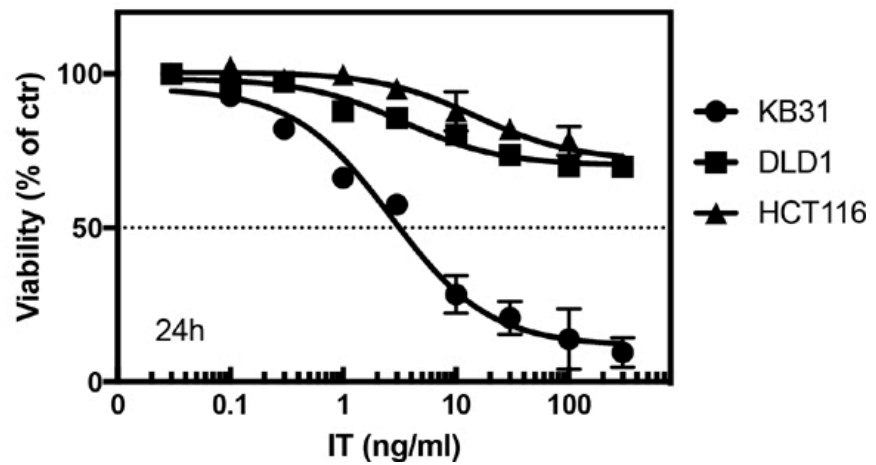

Supplement: NIHMS999204-supplement-Supp_Fig_1.pdf [file NIHMS999204-supplement-Supp_Fig_1.pdf]

## Supplementary Figure 3

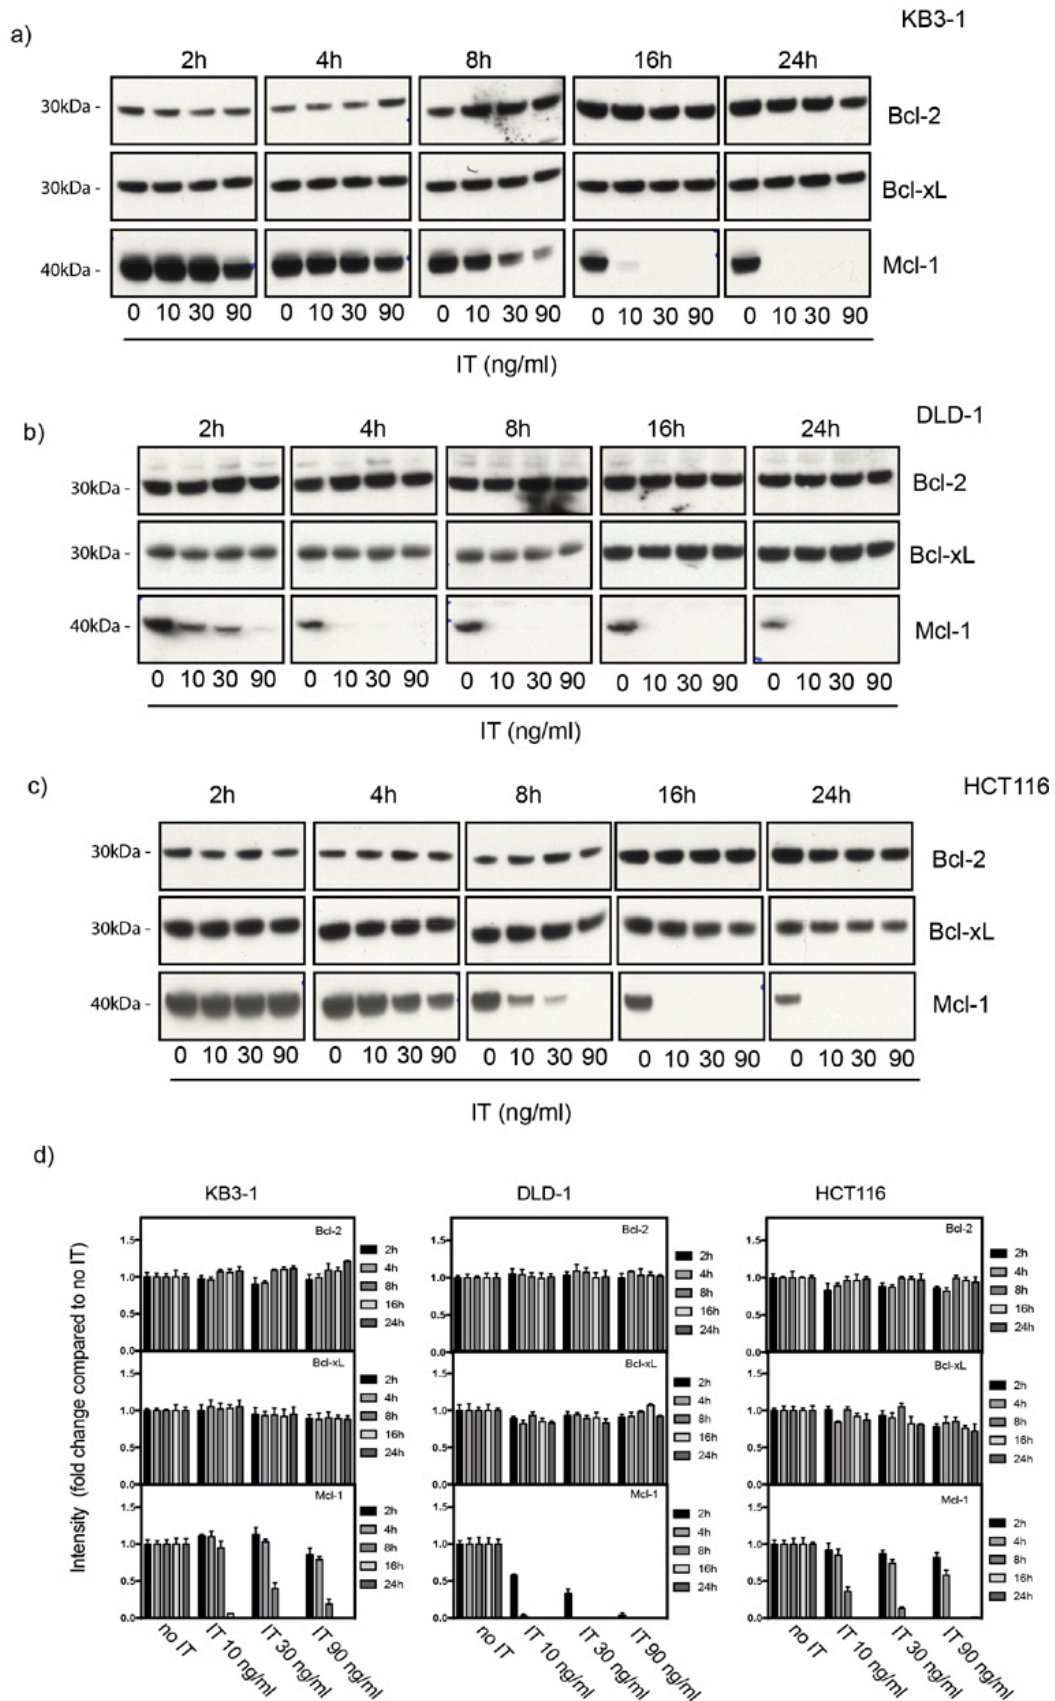

Supplement: NIHMS999204-supplement-Supp_Fig_3.pdf [file NIHMS999204-supplement-Supp_Fig_3.pdf]

## Supplementary Figure 4

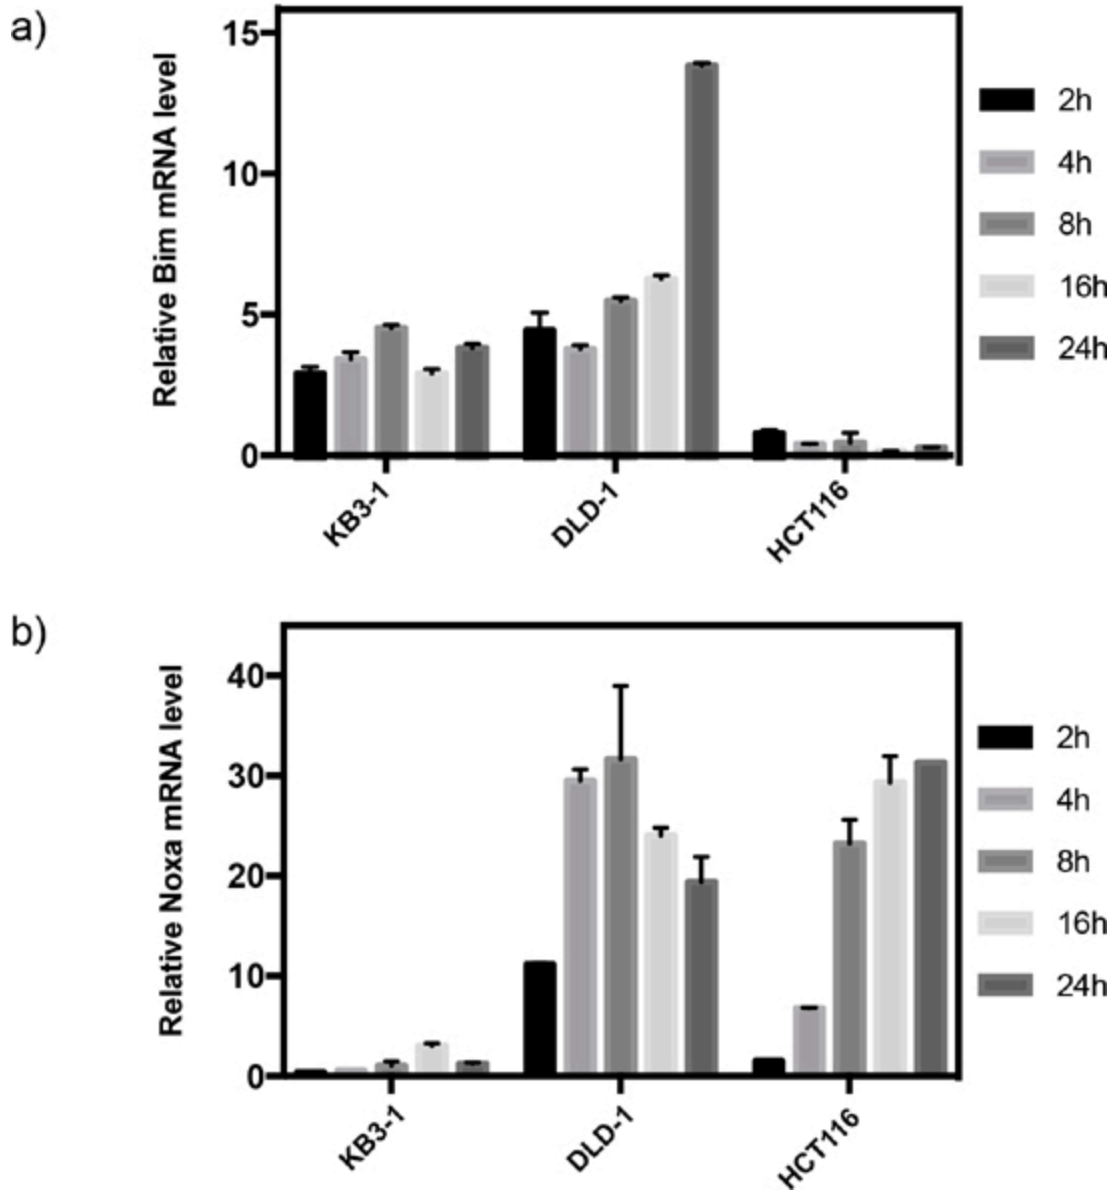

Supplement: NIHMS999204-supplement-Supp_Fig_4.pdf [file NIHMS999204-supplement-Supp_Fig_4.pdf]
